# Supplementary material for: Effect of SGLT-2 inhibitors on arrhythmia events: insight from an updated secondary analysis of > 80,000 patients (the SGLT2i—Arrhythmias and Sudden Cardiac Death)
Source: Springer Nature journal article supplement (doi:10.1186/s12933-024-02137-x), 2024-02-24
Supplement: MOESM1 [file 12933_2024_2137_MOESM1_ESM.pdf]

**Effect of SGLT-2 inhibitors on arrhythmia events: Insight from a systematic review and pooled-analysis (the SGLT2i – Arrhythmia)**

**Running title: the SGLT2i - Arrhythmia**

**Supplementary File**

- Supplement 1. PRISMA checklist
- Supplement 2. Search strategy
- Supplement 3. Flow diagram of the literature search and the study selection
- Supplement 4. Risk of bias graph of included studies
- Supplement 5. Risk of bias summary figure of included studies
- Supplement 6. Pooled baseline characteristics
- Supplement 7. The patients’ baseline characteristics
- Supplement 8. The subgroup analysis of atrial flutter, ventricular fibrillation, ventricular tachycardia, ventricular extrasystoles, sudden cardiac Death and the composite events of VF/VT/SCD
- Supplement 9. Results of sensitivity analyses
- Supplement 10. The Egger’s tests for all outcomes
- Supplement 11. Funnel plot analysis for all outcomes
- Supplement 12. Estimation of sample size and statistical power
- Supplement 13. Trial sequence analysis of adequate statistical powered outcomes
- Supplement 14. GRADE assessment

Supplement 1. PRISMA checklist

| Section and Topic             | Item # | Checklist item                                                                                                                                                                                                                                                                                       | Location where item is reported |
|-------------------------------|--------|------------------------------------------------------------------------------------------------------------------------------------------------------------------------------------------------------------------------------------------------------------------------------------------------------|---------------------------------|
| TITLE                         |        |                                                                                                                                                                                                                                                                                                      |                                 |
| Title                         | 1      | Identify the report as a systematic review.                                                                                                                                                                                                                                                          | 1                               |
| ABSTRACT                      |        |                                                                                                                                                                                                                                                                                                      |                                 |
| Abstract                      | 2      | See the PRISMA 2020 for Abstracts checklist.                                                                                                                                                                                                                                                         | 2                               |
| INTRODUCTION                  |        |                                                                                                                                                                                                                                                                                                      |                                 |
| Rationale                     | 3      | Describe the rationale for the review in the context of existing knowledge.                                                                                                                                                                                                                          | 3                               |
| Objectives                    | 4      | Provide an explicit statement of the objective(s) or question(s) the review addresses.                                                                                                                                                                                                               | 3                               |
| METHODS                       |        |                                                                                                                                                                                                                                                                                                      |                                 |
| Eligibility criteria          | 5      | Specify the inclusion and exclusion criteria for the review and how studies were grouped for the syntheses.                                                                                                                                                                                          | 3-4                             |
| Information sources           | 6      | Specify all databases, registers, websites, organisations, reference lists and other sources searched or consulted to identify studies. Specify the date when each source was last searched or consulted.                                                                                            | 3                               |
| Search strategy               | 7      | Present the full search strategies for all databases, registers and websites, including any filters and limits used.                                                                                                                                                                                 | Supplement 1                    |
| Selection process             | 8      | Specify the methods used to decide whether a study met the inclusion criteria of the review, including how many reviewers screened each record and each report retrieved, whether they worked independently, and if applicable, details of automation tools used in the process.                     | 3                               |
| Data collection process       | 9      | Specify the methods used to collect data from reports, including how many reviewers collected data from each report, whether they worked independently, any processes for obtaining or confirming data from study investigators, and if applicable, details of automation tools used in the process. | 4                               |
| Data items                    | 10a    | List and define all outcomes for which data were sought. Specify whether all results that were compatible with each outcome domain in each study were sought (e.g. for all measures, time points, analyses), and if not, the methods used to decide which results to collect.                        | 4                               |
|                               | 10b    | List and define all other variables for which data were sought (e.g. participant and intervention characteristics, funding sources). Describe any assumptions made about any missing or unclear information.                                                                                         | 4                               |
| Study risk of bias assessment | 11     | Specify the methods used to assess risk of bias in the included studies, including details of the tool(s) used, how many reviewers assessed each study and whether they worked independently, and if applicable, details of automation tools used in the process.                                    | 4                               |
| Effect measures               | 12     | Specify for each outcome the effect measure(s) (e.g. risk ratio, mean difference) used in the synthesis or presentation of results.                                                                                                                                                                  | 4                               |
| Synthesis methods             | 13a    | Describe the processes used to decide which studies were eligible for each synthesis (e.g. tabulating the study intervention characteristics and comparing against the planned groups for each synthesis (item #5)).                                                                                 | 4-5                             |
|                               | 13b    | Describe any methods required to prepare the data for presentation or synthesis, such as handling of missing summary statistics, or data conversions.                                                                                                                                                | 4-5                             |
|                               | 13c    | Describe any methods used to tabulate or visually display results of individual studies and syntheses.                                                                                                                                                                                               | 4-5                             |
|                               | 13d    | Describe any methods used to synthesize results and provide a rationale for the choice(s). If meta-analysis was performed, describe the model(s), method(s) to identify the presence and extent of statistical heterogeneity, and software package(s) used.                                          | 4-5                             |
|                               | 13e    | Describe any methods used to explore possible causes of heterogeneity among study results (e.g. subgroup analysis, meta-regression).                                                                                                                                                                 | 5                               |
|                               | 13f    | Describe any sensitivity analyses conducted to assess robustness of the synthesized results.                                                                                                                                                                                                         | 5                               |
| Reporting bias assessment     | 14     | Describe any methods used to assess risk of bias due to missing results in a synthesis (arising from reporting biases).                                                                                                                                                                              | 5                               |
| Certainty assessment          | 15     | Describe any methods used to assess certainty (or confidence) in the body of evidence for an outcome.                                                                                                                                                                                                | 5                               |

| Section and Topic                              | Item # | Checklist item                                                                                                                                                                                                                                                                       | Location where item is reported |
|------------------------------------------------|--------|--------------------------------------------------------------------------------------------------------------------------------------------------------------------------------------------------------------------------------------------------------------------------------------|---------------------------------|
| <b>RESULTS</b>                                 |        |                                                                                                                                                                                                                                                                                      |                                 |
| Study selection                                | 16a    | Describe the results of the search and selection process, from the number of records identified in the search to the number of studies included in the review, ideally using a flow diagram.                                                                                         | 5,Figure 1                      |
|                                                | 16b    | Cite studies that might appear to meet the inclusion criteria, but which were excluded, and explain why they were excluded.                                                                                                                                                          | 5                               |
| Study characteristics                          | 17     | Cite each included study and present its characteristics.                                                                                                                                                                                                                            | 5,Supplement 4                  |
| Risk of bias in studies                        | 18     | Present assessments of risk of bias for each included study.                                                                                                                                                                                                                         | 5,Supplement 2,3                |
| Results of individual studies                  | 19     | For all outcomes, present, for each study: (a) summary statistics for each group (where appropriate) and (b) an effect estimate and its precision (e.g. confidence/credible interval), ideally using structured tables or plots.                                                     | 6-7, Figure 2,5                 |
| Results of syntheses                           | 20a    | For each synthesis, briefly summarise the characteristics and risk of bias among contributing studies.                                                                                                                                                                               |                                 |
|                                                | 20b    | Present results of all statistical syntheses conducted. If meta-analysis was done, present for each the summary estimate and its precision (e.g. confidence/credible interval) and measures of statistical heterogeneity. If comparing groups, describe the direction of the effect. | 6-7,Figure 3, Supplement 5      |
|                                                | 20c    | Present results of all investigations of possible causes of heterogeneity among study results.                                                                                                                                                                                       | 7, Supplement 7-8               |
|                                                | 20d    | Present results of all sensitivity analyses conducted to assess the robustness of the synthesized results.                                                                                                                                                                           | 7,Supplement 6                  |
| Reporting biases                               | 21     | Present assessments of risk of bias due to missing results (arising from reporting biases) for each synthesis assessed.                                                                                                                                                              | 7                               |
| Certainty of evidence                          | 22     | Present assessments of certainty (or confidence) in the body of evidence for each outcome assessed.                                                                                                                                                                                  | 7,Supplementary 9               |
| <b>DISCUSSION</b>                              |        |                                                                                                                                                                                                                                                                                      |                                 |
| Discussion                                     | 23a    | Provide a general interpretation of the results in the context of other evidence.                                                                                                                                                                                                    | 7-10                            |
|                                                | 23b    | Discuss any limitations of the evidence included in the review.                                                                                                                                                                                                                      | 10                              |
|                                                | 23c    | Discuss any limitations of the review processes used.                                                                                                                                                                                                                                | 10                              |
|                                                | 23d    | Discuss implications of the results for practice, policy, and future research.                                                                                                                                                                                                       | 7-10                            |
| <b>OTHER INFORMATION</b>                       |        |                                                                                                                                                                                                                                                                                      |                                 |
| Registration and protocol                      | 24a    | Provide registration information for the review, including register name and registration number, or state that the review was not registered.                                                                                                                                       | 11                              |
|                                                | 24b    | Indicate where the review protocol can be accessed, or state that a protocol was not prepared.                                                                                                                                                                                       | 11                              |
|                                                | 24c    | Describe and explain any amendments to information provided at registration or in the protocol.                                                                                                                                                                                      | 11                              |
| Support                                        | 25     | Describe sources of financial or non-financial support for the review, and the role of the funders or sponsors in the review.                                                                                                                                                        | 11                              |
| Competing interests                            | 26     | Declare any competing interests of review authors.                                                                                                                                                                                                                                   | 11                              |
| Availability of data, code and other materials | 27     | Report which of the following are publicly available and where they can be found: template data collection forms; data extracted from included studies; data used for all analyses; analytic code; any other materials used in the review.                                           | 11                              |

Supplement 2. Search strategy

|                    |     |                                                                                                                                                                                                                                                                                                                 |
|--------------------|-----|-----------------------------------------------------------------------------------------------------------------------------------------------------------------------------------------------------------------------------------------------------------------------------------------------------------------|
| Intervention       | #1  | ‘Sodium-Glucose Transporter 2 Inhibitors’ OR ‘Sodium-Glucose Transporter 2 Inhibitor’ OR ‘Sodium Glucose Transporter 2 Inhibitors’ OR ‘Sodium Glucose Transporter 2 Inhibitor’ OR ‘SGLT-2 Inhibitors’ OR ‘SGLT-2 Inhibitor’ OR ‘SGLT2 Inhibitors’ OR ‘SGLT2 Inhibitor’ OR ‘SGLT2is’ OR ‘SGLT2i’ OR ‘Gliflozins’ |
|                    | #2  | ‘Canagliflozin’ OR ‘invokana’ OR ‘sulisent’ OR ‘TA7284’ OR ‘JNJ28431754’                                                                                                                                                                                                                                        |
|                    | #3  | ‘Dapagliflozin’ OR ‘farxiga’ OR ‘forxiga’ OR ‘BMS512148’                                                                                                                                                                                                                                                        |
|                    | #4  | ‘Ertugliflozin’ OR ‘PF04971729’                                                                                                                                                                                                                                                                                 |
|                    | #5  | ‘Sotagliflozin’ OR ‘LX4221’                                                                                                                                                                                                                                                                                     |
|                    | #6  | ‘Empagliflozin’ OR ‘jardiance’ OR ‘BI10773’                                                                                                                                                                                                                                                                     |
|                    | #7  | #1 OR #2 OR #3 OR #4 OR #5 OR #6                                                                                                                                                                                                                                                                                |
| Patient population | #8  | ‘Type 2 Diabetes Mellitus’ OR ‘Type 2 Diabetes’ OR ‘T2DM’ OR ‘T2D’ OR ‘MODY’ OR ‘NIDDM’ OR ‘Noninsulin Dependent Diabetes Mellitus’ OR ‘Maturity Onset Diabetes’ OR ‘Ketosis-Resistant Diabetes Mellitus’ OR ‘Slow-Onset Diabetes Mellitus’ OR ‘Adult-Onset Diabetes Mellitus’                                  |
|                    | #9  | ‘Heart Failure’ OR ‘Cardiac Failure’ OR ‘Heart Decompensation’ OR ‘Left-Sided Heart Failure’ OR ‘Right-Sided Heart Failure’ OR ‘Myocardial Failure’ OR ‘Congestive Heart Failure’                                                                                                                               |
|                    | #10 | ‘Chronic Kidney Disease’ OR ‘Chronic Renal Diseases’ OR ‘Kidney Impairment’ OR ‘renal Impairment’ OR ‘Chronic Renal Insufficiency’ OR ‘Chronic Renal Insufficiencies’ OR ‘Chronic Kidney Insufficiency’ OR ‘Chronic Kidney Insufficiencies’                                                                     |
|                    | #11 | #8 OR #9 OR #10                                                                                                                                                                                                                                                                                                 |
| Type of study      | #12 | ‘randomized controlled trial’ OR ‘RCT’ OR ‘controlled clinical trial’ OR ‘randomized’ OR ‘placebo’                                                                                                                                                                                                              |
| Combined           | #13 | #7 AND #11 AND #12                                                                                                                                                                                                                                                                                              |

Supplement 3. Flow diagram of literature search and study selection

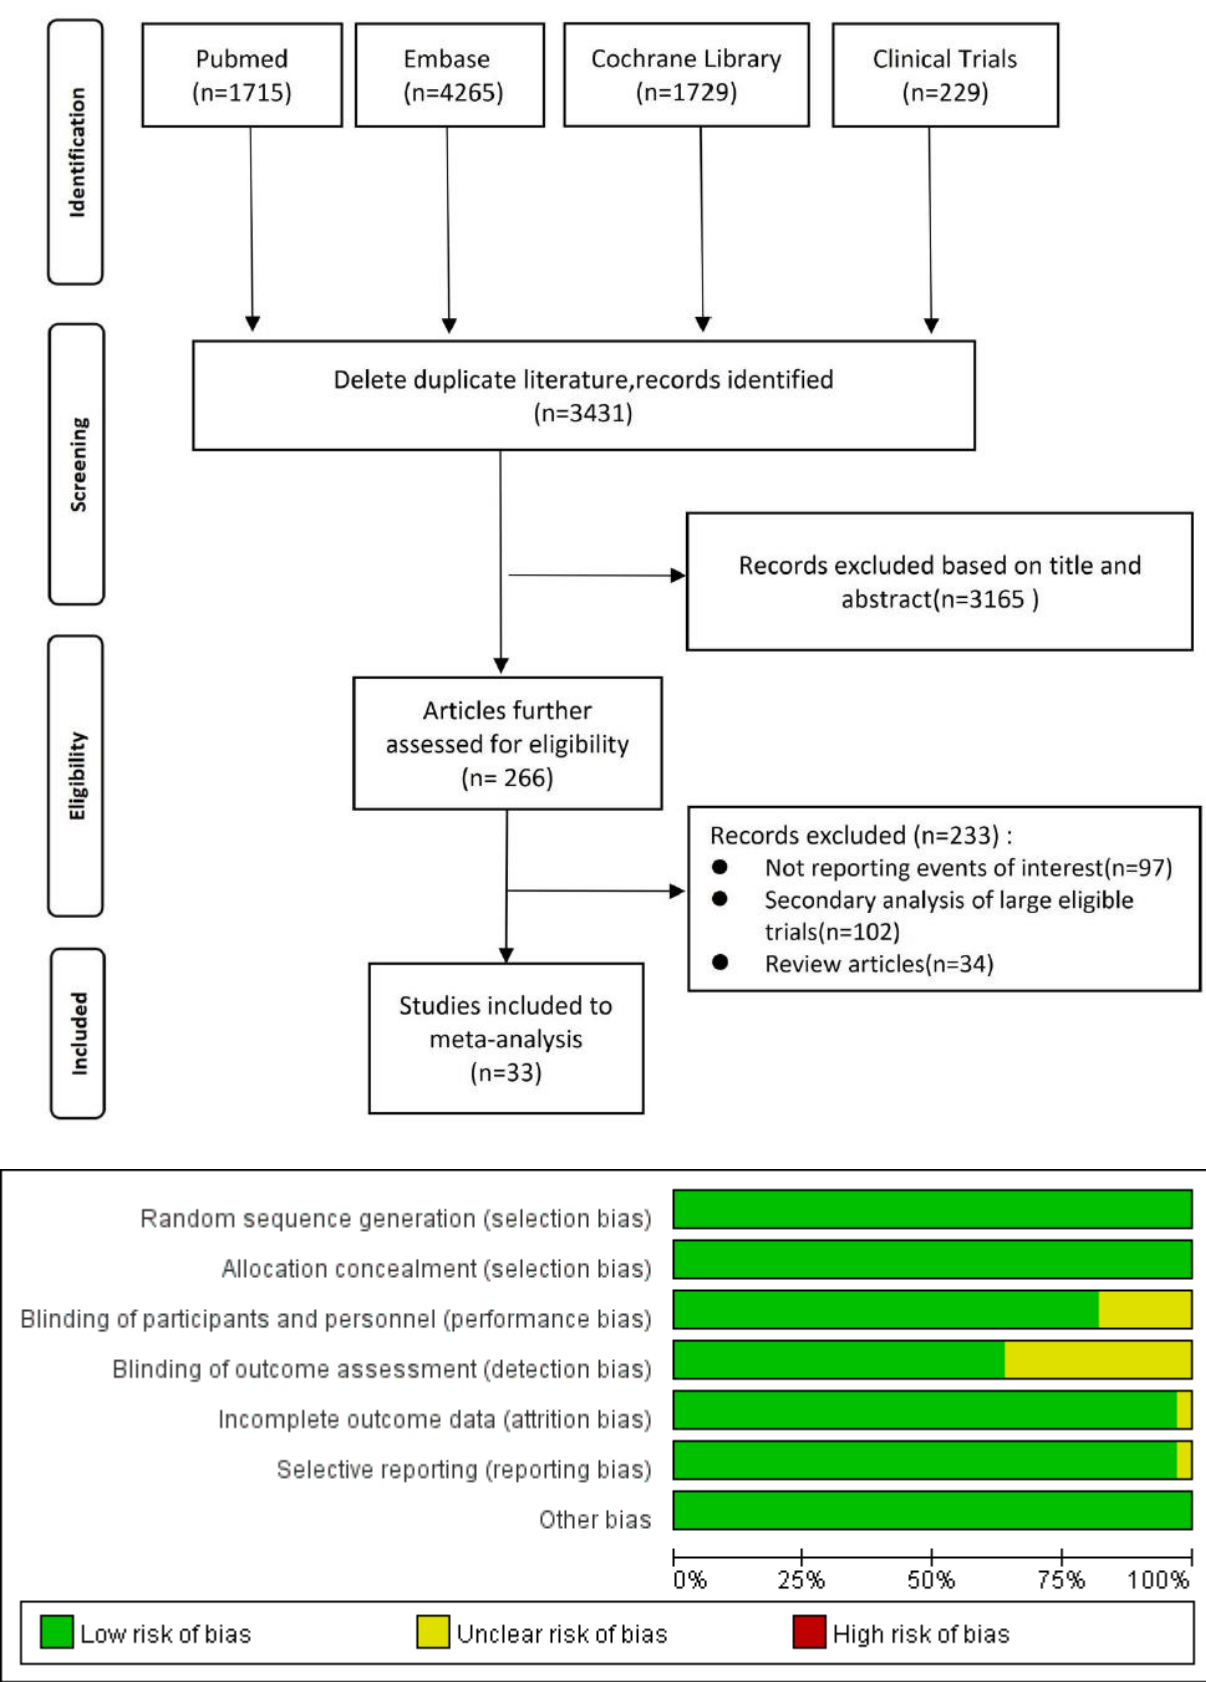

Supplement 4. Risk of bias graph of included studies

|                              | Random sequence generation (selection bias) | Allocation concealment (selection bias) | Blinding of participants and personnel (performance bias) | Blinding of outcome assessment (detection bias) | Incomplete outcome data (attrition bias) | Selective reporting (reporting bias) | Other bias |
|------------------------------|---------------------------------------------|-----------------------------------------|-----------------------------------------------------------|-------------------------------------------------|------------------------------------------|--------------------------------------|------------|
| Bailey,2013                  | +                                           | +                                       | +                                                         | +                                               | +                                        | +                                    | +          |
| Bode,2015                    | +                                           | +                                       | ?                                                         | ?                                               | +                                        | ?                                    | +          |
| CANTATA-MSU,2013             | +                                           | +                                       | +                                                         | +                                               | +                                        | +                                    | +          |
| CANVAS,2017                  | +                                           | +                                       | +                                                         | +                                               | +                                        | +                                    | +          |
| Ceralu,2015                  | +                                           | +                                       | ?                                                         | ?                                               | +                                        | +                                    | +          |
| CREDENCE,2019                | +                                           | +                                       | +                                                         | +                                               | +                                        | +                                    | +          |
| DAPA-CKD,2020                | +                                           | +                                       | +                                                         | +                                               | +                                        | +                                    | +          |
| DAPA-HF,2019                 | +                                           | +                                       | +                                                         | +                                               | +                                        | +                                    | +          |
| DECLARE – TIMI 58,2019       | +                                           | +                                       | +                                                         | +                                               | +                                        | +                                    | +          |
| DEFINE-HF Trial,2019         | +                                           | +                                       | +                                                         | +                                               | ?                                        | +                                    | +          |
| EMPA-HEART CardioLink-6,2019 | +                                           | +                                       | +                                                         | +                                               | +                                        | +                                    | +          |
| EMPA-REG EXTEND MONO,2015    | +                                           | +                                       | +                                                         | +                                               | +                                        | +                                    | +          |
| EMPA-REG EXTEND™ PIO,2015    | +                                           | +                                       | +                                                         | ?                                               | +                                        | +                                    | +          |
| EMPA-REG OUTCOME,2015        | +                                           | +                                       | +                                                         | +                                               | +                                        | +                                    | +          |
| EMPA-REG RENAL,2014          | +                                           | +                                       | +                                                         | +                                               | +                                        | +                                    | +          |
| EMPA-RESPONSE-AHF,2019       | +                                           | +                                       | +                                                         | ?                                               | +                                        | +                                    | +          |
| EMPA-TROPISM,2020            | +                                           | +                                       | +                                                         | +                                               | +                                        | +                                    | +          |
| EMPERIAL-Preserved,2020      | +                                           | +                                       | ?                                                         | ?                                               | +                                        | +                                    | +          |
| EMPERIAL-Reduced,2020        | +                                           | +                                       | ?                                                         | ?                                               | +                                        | +                                    | +          |
| EMPEROR-Preserved,2021       | +                                           | +                                       | +                                                         | +                                               | +                                        | +                                    | +          |
| EMPEROR-Reduced,2020         | +                                           | +                                       | +                                                         | +                                               | +                                        | +                                    | +          |
| EMPULSE,2022                 | +                                           | +                                       | +                                                         | ?                                               | +                                        | +                                    | +          |
| Inagaki,2013                 | +                                           | +                                       | +                                                         | +                                               | +                                        | +                                    | +          |
| Leiter,2014                  | +                                           | +                                       | ?                                                         | ?                                               | +                                        | +                                    | +          |
| Rosenstock,2015              | +                                           | +                                       | ?                                                         | ?                                               | +                                        | +                                    | +          |
| SCORED,2021                  | +                                           | +                                       | +                                                         | +                                               | +                                        | +                                    | +          |
| SOLOIST-WHF,2020             | +                                           | +                                       | +                                                         | +                                               | +                                        | +                                    | +          |
| Søfteland,2017               | +                                           | +                                       | +                                                         | ?                                               | +                                        | +                                    | +          |
| VERTIS CV,2020               | +                                           | +                                       | +                                                         | +                                               | +                                        | +                                    | +          |
| VERTIS MET,2018              | +                                           | +                                       | ?                                                         | ?                                               | +                                        | +                                    | +          |
| VERTIS RENAL,2018            | +                                           | +                                       | +                                                         | +                                               | +                                        | +                                    | +          |
| Wilding,2012                 | +                                           | +                                       | +                                                         | ?                                               | +                                        | +                                    | +          |
| Yale,2014                    | +                                           | +                                       | +                                                         | +                                               | +                                        | +                                    | +          |

Supplement 5. Risk of bias summary figure of included studies

Supplement 6. Pooled baseline characteristics

|                     | Total             | Randomized to<br>SGLT2i group | Randomized to<br>Control |
|---------------------|-------------------|-------------------------------|--------------------------|
| Sample Size, n      | 88098             | 48585                         | 39513                    |
| Age, y              | 64.9±9.4          | 64.6±9.4                      | 65.2±9.4                 |
| Male, n(%)          | 55467/88098(63.0) | 30318/48585(62.4)             | 25149/39513(63.6)        |
| LVEF, %             | 39.2±14.6         | 39.3±14.5                     | 39.1±14.7                |
| eGFR, ml/min/1.73m² | 67.3±23.6         | 67.9±23.5                     | 66.6±23.6                |
| HF, n(%)            | 27677/80183(34.5) | 14327/43370(33.0)             | 13350/36813(36.3)        |
| DM, n(%)            | 78212/88098(88.8) | 43643/48585(89.8)             | 34569/39513(87.5)        |
| CKD, n(%)           | 14851/17851(83.2) | 7614/9107(83.6)               | 7237/8744(82.8)          |
| AF history, n(%)    | 6855/16045(42.7)  | 3441/8024(42.9)               | 3414/8021(42.6)          |

LVEF: left ventricular ejection fraction, eGFR: estimated glomerular filtration rate, HF: heart failure, DM: diabetes mellitus, CKD: chronic kidney disease, AF: atrial fibrillation

Supplement 7. The patients’ baseline characteristics

| Study                        | NCT identifier number | Groups                                    | Patients randomized (intervention/control) | Participants         | Age, mean (SD), y | Male, no.(%) | LVEF,%     | eGFR, ml/min/1.73m² | Patients with a history of HF,no(%) | Patients with a history of AF,no(%) | Patients with a history of DM,no(%) | Patients with a history of CKD,no(%) | Mean follow-up, y |
|------------------------------|-----------------------|-------------------------------------------|--------------------------------------------|----------------------|-------------------|--------------|------------|---------------------|-------------------------------------|-------------------------------------|-------------------------------------|--------------------------------------|-------------------|
| Wilding,2012                 | NCT00673231           | Dapagliflozin 2.5/5/10mg or Placebo       | 800 (607/193)                              | T2DM                 | 59.3±8.2          | 382(47.8)    | NA         | NA                  | NA                                  | NA                                  | 800(100)                            | NA                                   | 1.0               |
| Inagaki,2013                 | NCT01022112           | Canagliflozin 50/100/200/300mg or Placebo | 382 (307/75)                               | T2DM                 | 57.4±10.6         | 260(68.1)    | NA         | 84.8±15.7           | NA                                  | NA                                  | 382(100)                            | NA                                   | 0.25              |
| Bailey,2013                  | NCT00528879           | Dapagliflozin 2.5mg/5mg/10mg or Placebo   | 546 (409/137)                              | T2DM                 | 53.9±9.7          | 292(53.5)    | NA         | NA                  | NA                                  | NA                                  | 546(100)                            | NA                                   | 2.125             |
| CANTATA-MSU,2013             | NCT01106625           | Canagliflozin 100/300mg or Placbo         | 469 (313/156)                              | T2DM                 | 56.8 ± 9.3        | 239 (51.0)   | NA         | NA                  | NA                                  | NA                                  | 469(100)                            | NA                                   | 1.08              |
| Yale,2014                    | NCT01064414           | Canagliflozin 100/300mg or Placbo         | 269 (179/90)                               | T2DM with CKD        | 68.5±8.3          | 163 (60.6)   | NA         | 39.4±6.9            | NA                                  | NA                                  | 269(100)                            | 269(100)                             | 1.08              |
| Leiter,2014                  | NCT01042977           | Dapagliflozin 10 mg or placebo            | 962 (480/482)                              | T2DM with CVD        | 63.7 ± 7.3        | 644(66.9)    | NA         | NA                  | 152(15.8)                           | NA                                  | 962(100)                            | NA                                   | 0.5               |
| EMPA-REG RENAL,2014          | NCT01164501           | Empagliflozin 10/25mg or Placebo          | 738 (419/319)                              | T2DM with CKD        | 63.9±8.8          | 430(58.3)    | NA         | NA                  | NA                                  | NA                                  | 738(100)                            | 738(100)                             | 1.08              |
| Bode,2015                    | NCT01106651           | Canagliflozin 100/300mg or Placbo         | 714 (477/237)                              | T2DM                 | 63.6 ± 6.2        | 396 (55.5)   | NA         | 77.5 ± 16.6         | NA                                  | NA                                  | 714(100)                            | NA                                   | 2.17              |
| Cefalu,2015                  | NCT01031680           | Dapagliflozin10mg or Placbo               | 914 (455/459)                              | T2DM with CVD        | 62.9 ± 7.4        | 624(68.3)    | NA         | NA                  | NA                                  | NA                                  | 914(100)                            | NA                                   | 1.08              |
| Rosenstock,2015              | NCT01011868           | Empagliflozin 10/25mg or Placebo          | 494 (324/170)                              | T2DM                 | 58.8 ± 9.9        | 276 (56)     | NA         | 84 ± 24             | NA                                  | NA                                  | 494(100)                            | NA                                   | 1.625             |
| EMPA-REG EXTEND™ PIO,2015    | NCT01210001           | Empagliflozin 10/25mg or Placebo          | 498 (333/165)                              | T2DM                 | 54.5±9.8          | 241 (48.4)   | NA         | 85.7±21.9           | NA                                  | NA                                  | 498(100)                            | NA                                   | 1.58              |
| EMPA-REG EXTEND™ MONO ,2015  | NCT01289990           | Empagliflozin 10/25mg or Placebo          | 676 (448/228)                              | T2DM                 | 54.9±11.4         | 410(60.7)    | NA         | 87.3±18.4           | NA                                  | NA                                  | 676(100)                            | NA                                   | 1.58              |
| EMPA-REG OUTCOME,2015        | NCT01131676           | Empagliflozin 10/25mg or Placebo          | 7020 (4687/2333)                           | T2DM at high CV risk | 63.1±8.7          | 5016(71.5)   | NA         | 74.1±21.4           | 706(10.1)                           | NA                                  | 7020(100)                           | NA                                   | 3.1               |
| Søfteland,2017               | NCT01734785           | Empagliflozin 10/25mg or Placebo          | 327 (219/108)                              | T2DM                 | 55.2±9.8          | 197(60.2)    | NA         | 92.3±18.0           | NA                                  | NA                                  | 327(100)                            | NA                                   | 0.5               |
| CANVAS,2017                  | NCT01989754           | Canagliflozin 100/300mg or Placebo        | 10142 (5795/4347)                          | T2DM at high CV risk | 63.3±8.3          | 6509(64.2)   | NA         | 76.5±20.5           | 1461 (14.4)                         | NA                                  | 10142(100)                          | NA                                   | 3.6               |
| VERTIS MET,2018              | NCT02033889           | Ertugliflozin 5/15mg or Placebo           | 621 (412/209)                              | T2DM                 | 56.6 ± 8.8        | 288 (46.4)   | NA         | 90.5 ± 19.3         | NA                                  | NA                                  | 621(100)                            | NA                                   | 0.54              |
| VERTIS RENAL,2018            | NCT01986855           | Ertugliflozin 5/15mg or Placebo           | 467 (313/154)                              | T2DM with CKD        | 67.3± 8.6         | 231 (49.5)   | NA         | 46.6±8.8            | NA                                  | NA                                  | 467(100)                            | 467(100)                             | 1.08              |
| EMPA-HEART CardioLink-6,2019 | NCT02998970           | Empagliflozin 10mg or Placebo             | 97 (49/48)                                 | T2DM with CAD        | 63.6± 10.7        | 90(92.8)     | NA         | 87.8±17.6           | 6(6.2)                              | NA                                  | 97(100)                             | NA                                   | 0.5               |
| EMPA-RESPONSE-AHF,2019       | NCT03200860           | Empagliflozin 10mg or Placebo             | 79 (40/39)                                 | acute HF             | 75.3± 13.3        | 53(67.1)     | 36.5± 15.5 | 55±18               | 79(100)                             | 56(70.9)                            | 26(32.9)                            | NA                                   | 0.08              |



|                         |             |                                       |                      |                                   |           |             |           |           |            |            |            |            |      |
|-------------------------|-------------|---------------------------------------|----------------------|-----------------------------------|-----------|-------------|-----------|-----------|------------|------------|------------|------------|------|
| DEFINE-HF Trial,2019    | NCT02653482 | Dapagliflozin 10mg<br>or Placebo      | 263<br>(131/132)     | HF with LVEF ≤40%                 | 61.3±11.5 | 193(73.4)   | 26.4±8.1  | 69.1±22.2 | 263(100)   | 106(40.3)  | 166(63.1)  | NA         | 0.25 |
| CREDENCE,2019           | NCT02065791 | Canagliflozin 100mg<br>or Placebo     | 4401<br>(2202/2199)  | T2DM with CKD                     | 63.0±9.2  | 2907(66.1)  | NA        | 56.2±18.2 | 652 (14.8) | NA         | 4401(100)  | 4401(100)  | 2.62 |
| DAPA-HF,2019            | NCT03036124 | Dapagliflozin 10mg<br>or Placebo      | 4744<br>(2373/2371)  | HF with LVEF ≤40%                 | 66.3±10.9 | 3635(76.6)  | 31.1±6.8  | 65.8±19.5 | 4744(100)  | 1818(38.3) | 1983(41.8) | NA         | 1.5  |
| DECLARE–TIMI 58,2019    | NCT01730534 | Dapagliflozin 10mg<br>or Placebo      | 17160<br>(8582/8578) | T2DM at high CV risk              | 63.9±6.8  | 10738(62.6) | NA        | 85.3±15.9 | 1724(10.0) | NA         | 17160(100) | NA         | 4.2  |
| EMPA-TROPISM,2020       | NCT03485222 | Empagliflozin 10mg<br>or Placebo      | 84<br>(42/42)        | HFrEF without DM                  | 62±12.1   | 54(64)      | NA        | 81.5±21.9 | 84(100)    | 18(21.4)   | 0(0)       | NA         | 0.5  |
| EMPERIAL-Reduced,2020   | NCT03448419 | Empagliflozin 10mg<br>or Placebo      | 312<br>(156/156)     | HFrEF                             | 69.7±10.8 | 232(74.4)   | 30±7.4    | 57.3±22.9 | 312(100)   | 74 (23.7)  | 187 (59.9) | NA         | 0.25 |
| EMPERIAL-Preserved,2020 | NCT03448406 | Empagliflozin 10mg<br>or Placebo      | 315<br>(157/158)     | HFpEF                             | 74.0±8.9  | 179(56.8)   | 52.2±9.2  | 57.2±20.5 | 315(100)   | 95 (30.2)  | 161 (51.1) | NA         | 0.25 |
| DAPA-CKD,2020           | NCT03036150 | Dapagliflozin 10mg<br>or Placebo      | 4304<br>(2152/2152)  | CKD                               | 61.9±12.1 | 2879(66.9)  | NA        | 43.1±12.3 | 468(10.9)  | NA         | 2906(67.5) | NA         | 2.4  |
| EMPEROR-Reduced,2020    | NCT03057977 | Empagliflozin 10mg<br>or Placebo      | 3730<br>(1863/1867)  | HF with LVEF ≤40%                 | 66.8±11.0 | 2837(76.1)  | 27.4±6.1  | 61.0±21.6 | 3730(100)  | 1369(36.7) | 1856(49.8) | NA         | 1.33 |
| SOLOIST-WHF,2020        | NCT03521934 | Sotagliflozin 200/400mg<br>or Placebo | 1222<br>(608/614)    | T2DM with<br>worsening HF         | 69.7±9.3  | 810(66.3)   | 36.3±13.4 | 51.0±17.0 | 1222(100)  | NA         | 1222(100)  | NA         | 0.75 |
| VERTIS CV,2020          | NCT01986881 | Ertugliflozin 5/15mg<br>or Placebo    | 8246<br>(5499/2747)  | T2DM with CVD                     | 64.4±8.1  | 5769(70.0)  | NA        | NA        | 1958(23.7) | NA         | 8246(100)  | NA         | 3.5  |
| EMPEROR-Preserved,2021  | NCT03057951 | Empagliflozin 10mg<br>or Placebo      | 5988<br>(2997/2991)  | HF with LVEF >40%                 | 71.8±9.5  | 3312(55.3)  | 54.3±8.8  | 60.6±19.8 | 5988(100)  | 3057(51.1) | 2938(49.1) | 2988(49.9) | 2.18 |
| SCORED,2021             | NCT03315143 | Sotagliflozin 200/400mg<br>or Placebo | 10584<br>(5292/5292) | T2DM with CKD<br>and high CV risk | 68.7±8.2  | 5830(55.1)  | NA        | 44.3±10.7 | 3283(31.0) | NA         | 10584(100) | 10584(100) | 1.33 |
| EMPULSE,2022            | NCT04157751 | Empagliflozin 10 mg<br>or Placebo     | 530<br>(265/265)     | HF with LVEF ≤40%                 | 69.7±13.1 | 351(66.2)   | 33.7±18.2 | 52.3±22.4 | 530(100)   | 262(49.4)  | 240(45.3)  | NA         | 0.25 |

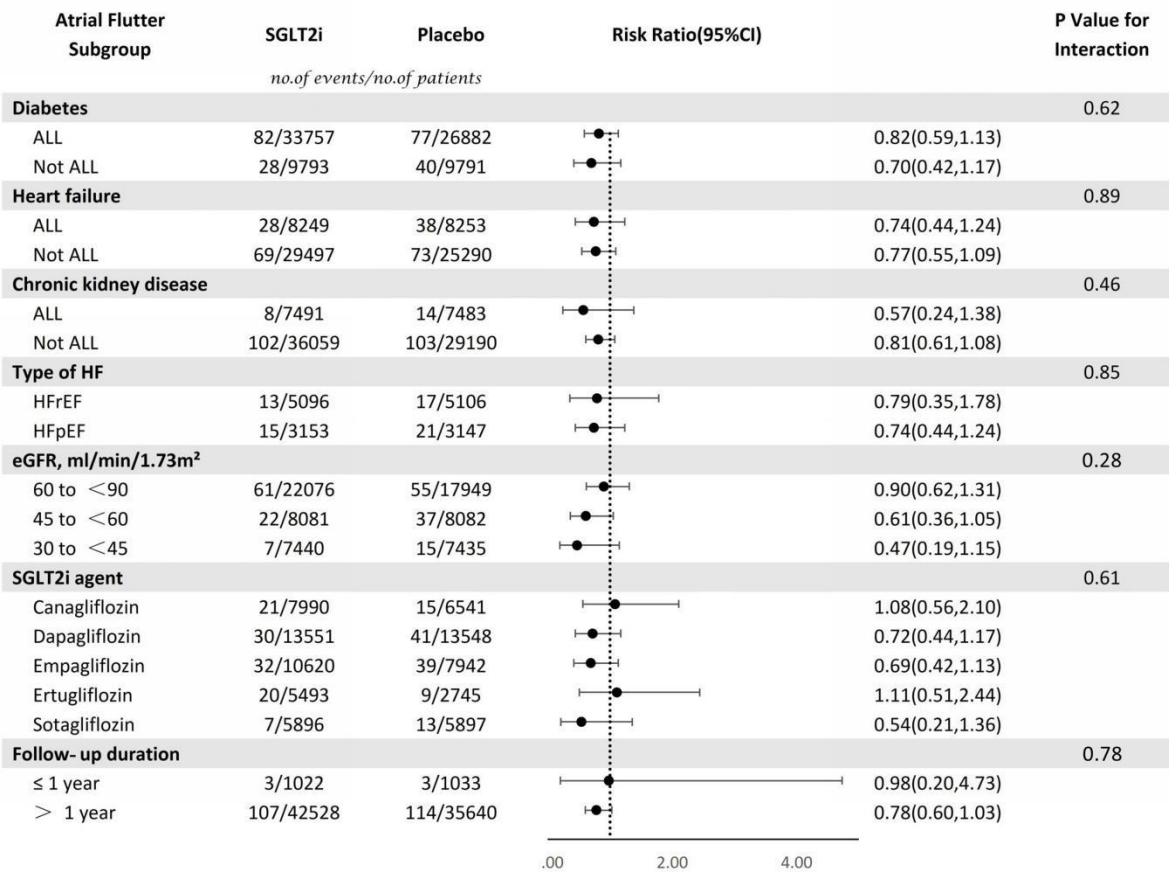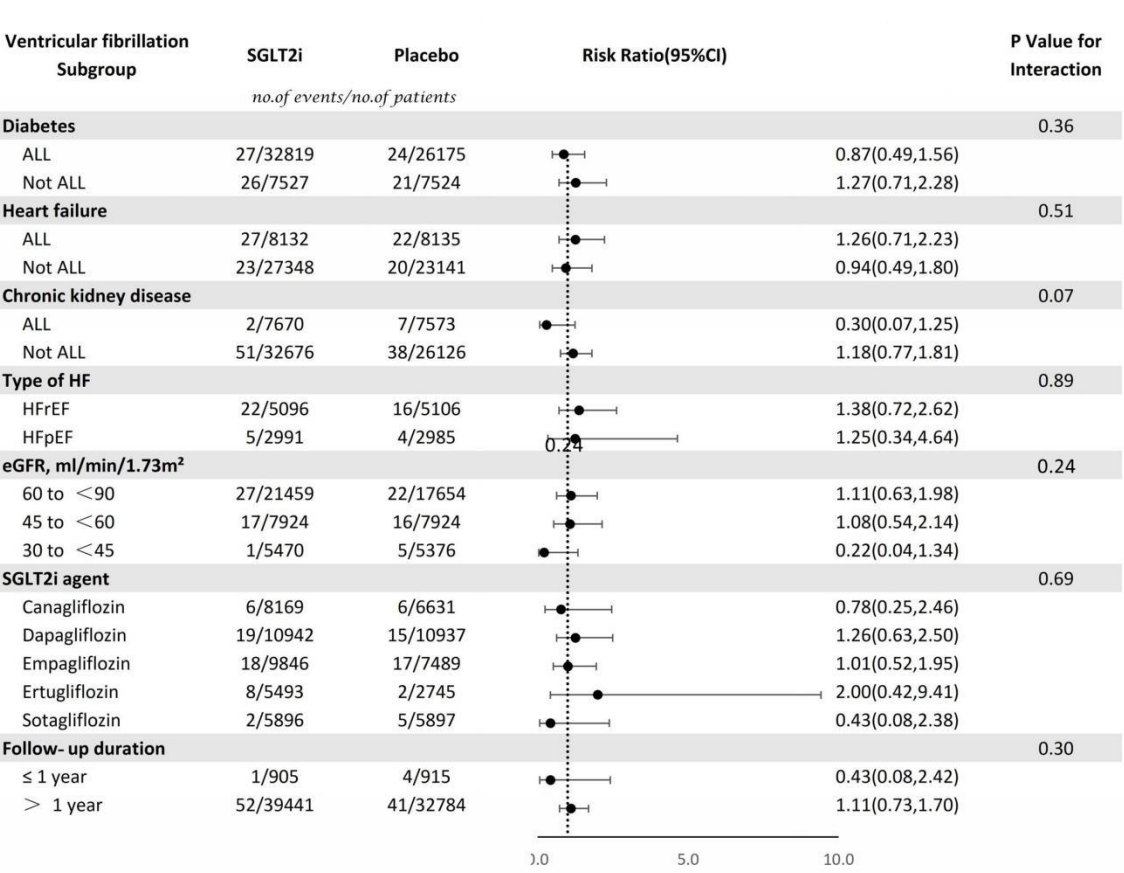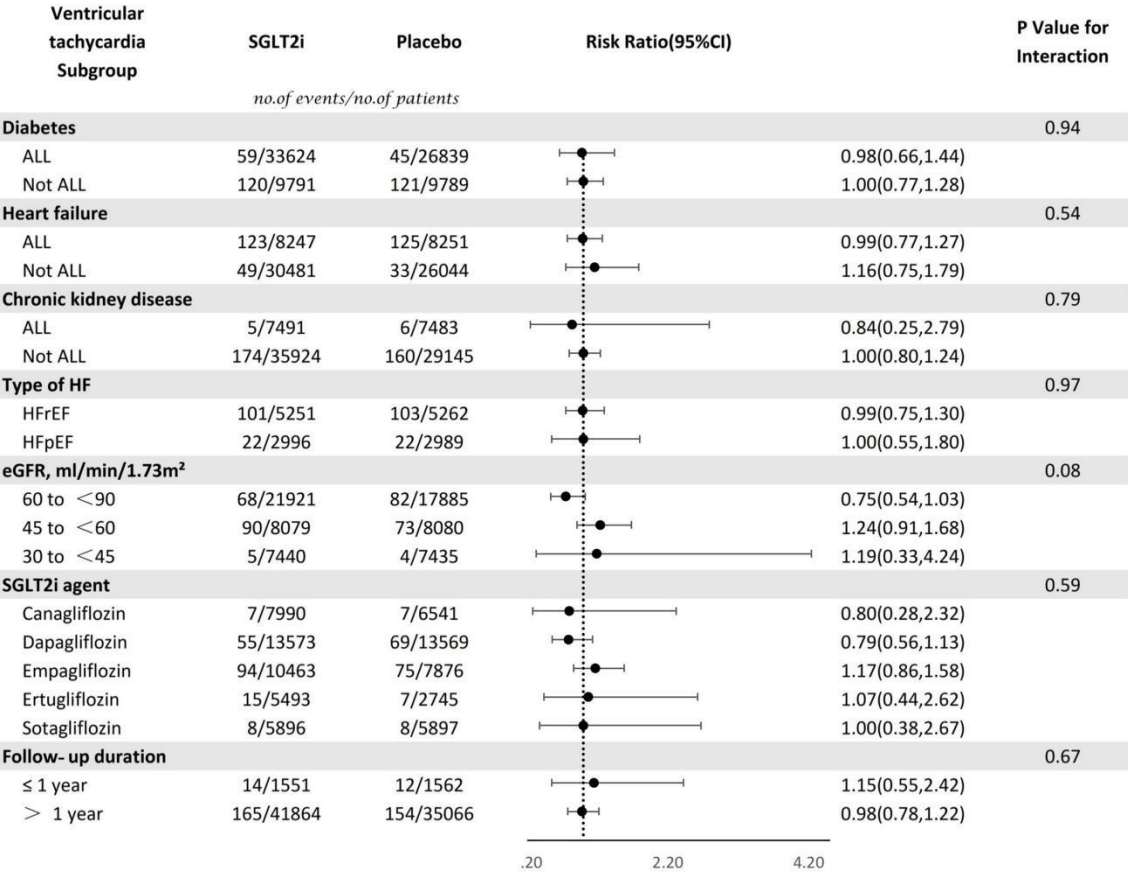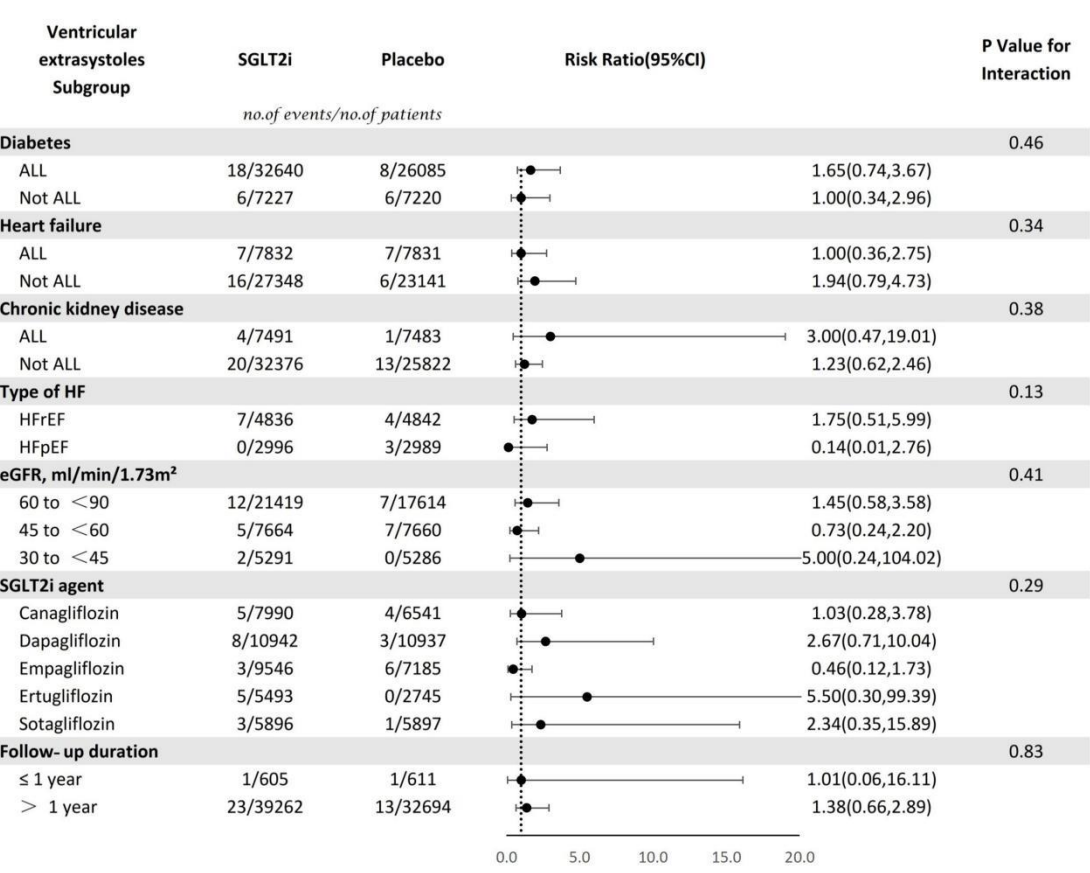

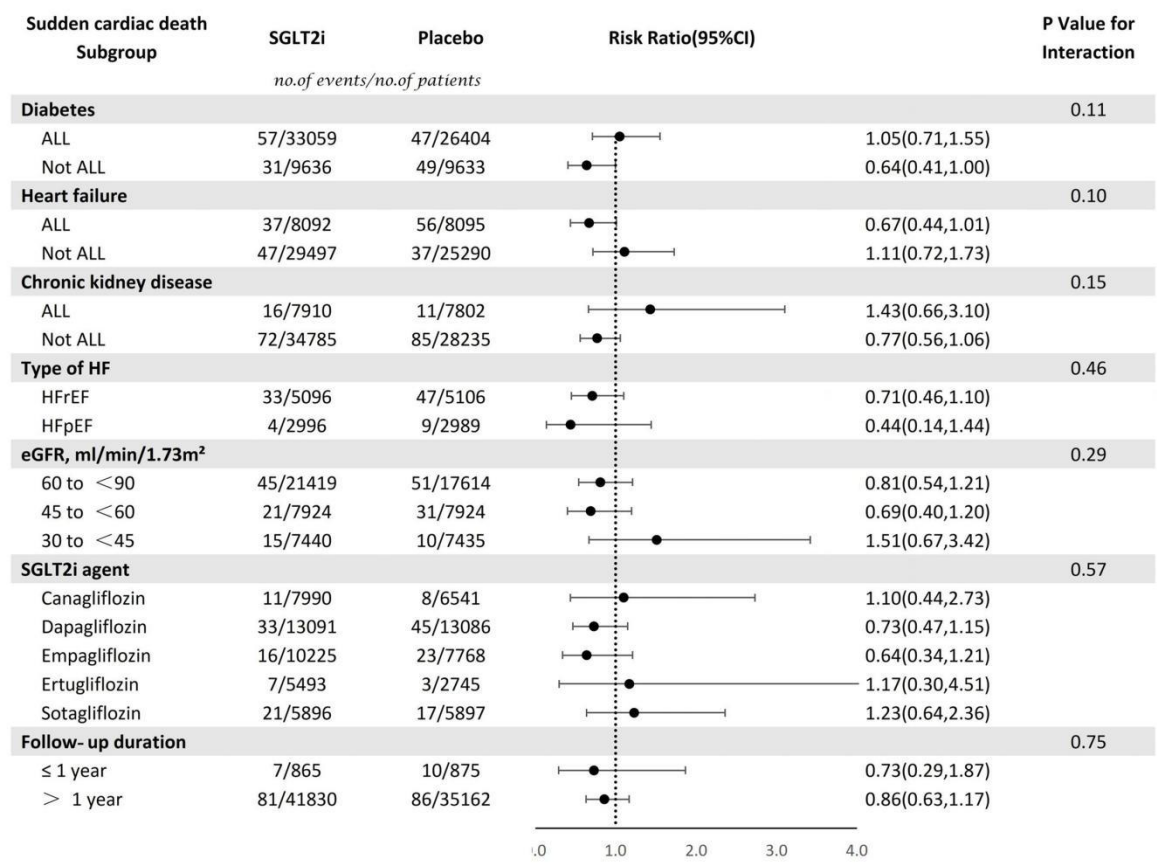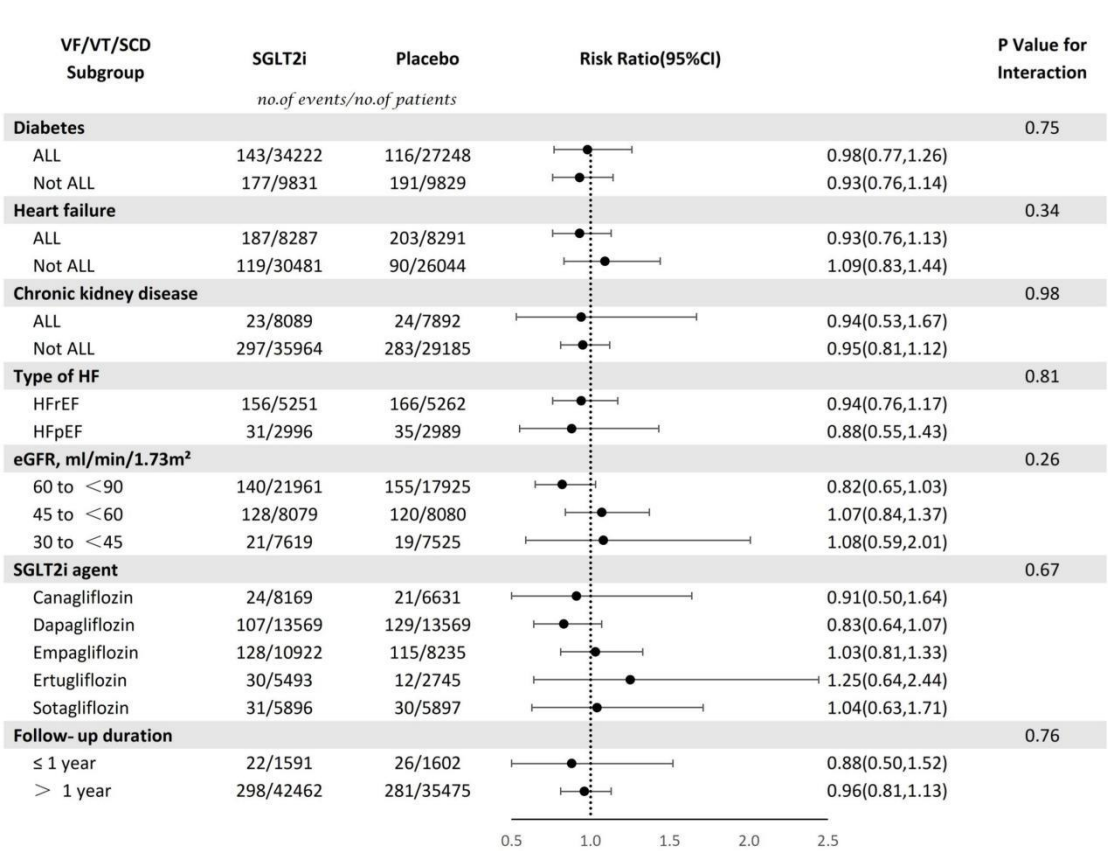

Supplement 8. The subgroup analysis of atrial flutter, ventricular fibrillation, ventricular tachycardia, ventricular extrasystoles, sudden cardiac Death and the composite events of VF/VT/SCD

Supplement 9. Results of sensitivity analyses

| Outcome                   | Analysis                                                 | Result                       |
|---------------------------|----------------------------------------------------------|------------------------------|
| Atrial fibrillation       | Primary analysis                                         | RR 0.88 (95% CI 0.78 – 1.00) |
|                           | Using OR as effect measure                               | RR 0.88 (95% CI 0.77 – 1.00) |
|                           | Excluding studies with high/unclear overall risk of bias | RR 0.87(95% CI 0.77 – 0.99)  |
|                           | excluding studies with small sample size (n<1000)        | RR 0.87(95% CI 0.77 – 0.99)  |
| Atrial flutter            | Primary analysis                                         | RR 0.78 (95% CI 0.60–1.03)   |
|                           | Using OR as effect measure                               | RR 0.78 (95% CI 0.60–1.03)   |
|                           | Excluding studies with high/unclear overall risk of bias | RR 0.78 (95% CI 0.59–1.03)   |
|                           | excluding studies with small sample size (n<1000)        | RR 0.78 (95% CI 0.59–1.03)   |
| AF/AFL                    | Primary analysis                                         | RR 0.86 (95% CI 0.77-0.96)   |
|                           | Using OR as effect measure                               | RR 0.86 (95% CI 0.76-0.96)   |
|                           | Excluding studies with high/unclear overall risk of bias | RR 0.86 (95% CI 0.76-0.96)   |
|                           | excluding studies with small sample size (n<1000)        | RR 0.86 (95% CI 0.76-0.96)   |
| Ventricular fibrillation  | Primary analysis                                         | RR 1.05 (95% CI 0.70-1.59)   |
|                           | Using OR as effect measure                               | RR 1.05 (95% CI 0.70-1.59)   |
|                           | Excluding studies with high/unclear overall risk of bias | RR 1.07 (95% CI 0.71-1.63)   |
|                           | excluding studies with small sample size (n<1000)        | RR 1.15 (95% CI 0.75-1.75)   |
| Ventricular tachycardia   | Primary analysis                                         | RR 0.99 (95% CI 0.80-1.22)   |
|                           | Using OR as effect measure                               | RR 0.99 (95% CI 0.80-1.23)   |
|                           | Excluding studies with high/unclear overall risk of bias | RR 0.98 (95% CI 0.79-1.22)   |
|                           | excluding studies with small sample size (n<1000)        | RR 0.98 (95% CI 0.79-1.22)   |
| Ventricular extrasystoles | Primary analysis                                         | RR 1.36 (95% CI 0.67-2.76)   |
|                           | Using OR as effect measure                               | RR 1.36 (95% CI 0.67-2.76)   |
|                           | Excluding studies with high/unclear overall risk of bias | RR 1.36 (95% CI 0.67-2.76)   |
|                           | excluding studies with small sample size (n<1000)        | RR 1.36 (95% CI 0.67-2.76)   |
| Sudden cardiac death      | Primary analysis                                         | RR 0.85 (95% CI 0.63-1.14)   |
|                           | Using OR as effect measure                               | RR 0.84 (95% CI 0.63-1.14)   |
|                           | Excluding studies with high/unclear overall risk of bias | RR 0.85 (95% CI 0.63-1.15)   |
|                           | excluding studies with small sample size (n<1000)        | RR 0.86 (95% CI 0.64-1.16)   |
| VF/VT/SCD                 | Primary analysis                                         | RR 0.95 (95% CI 0.81-1.11)   |
|                           | Using OR as effect measure                               | RR 0.95 (95% CI 0.81-1.12)   |
|                           | Excluding studies with high/unclear overall risk of bias | RR 0.95 (95% CI 0.81-1.12)   |
|                           | excluding studies with small sample size (n<1000)        | RR 0.96 (95% CI 0.82-1.13)   |

Supplement 10. The Egger’s tests for all outcomes

| Comparisons               | Egger test |         |
|---------------------------|------------|---------|
|                           | Z value    | P value |
| Atrial fibrillation       | -0.00      | 0.9966  |
| Atrial flutter            | 0.41       | 0.6827  |
| AF/AFL                    | 0.16       | 0.8766  |
| Ventricular fibrillation  | -1.92      | 0.0554  |
| Ventricular tachycardia   | 0.18       | 0.8554  |
| Ventricular extrasystoles | 0.12       | 0.9069  |
| Sudden cardiac death      | -0.48      | 0.6321  |
| VF/VT/SCD                 | -0.73      | 0.4671  |

Supplement 11. Funnel plot analysis for all outcomes

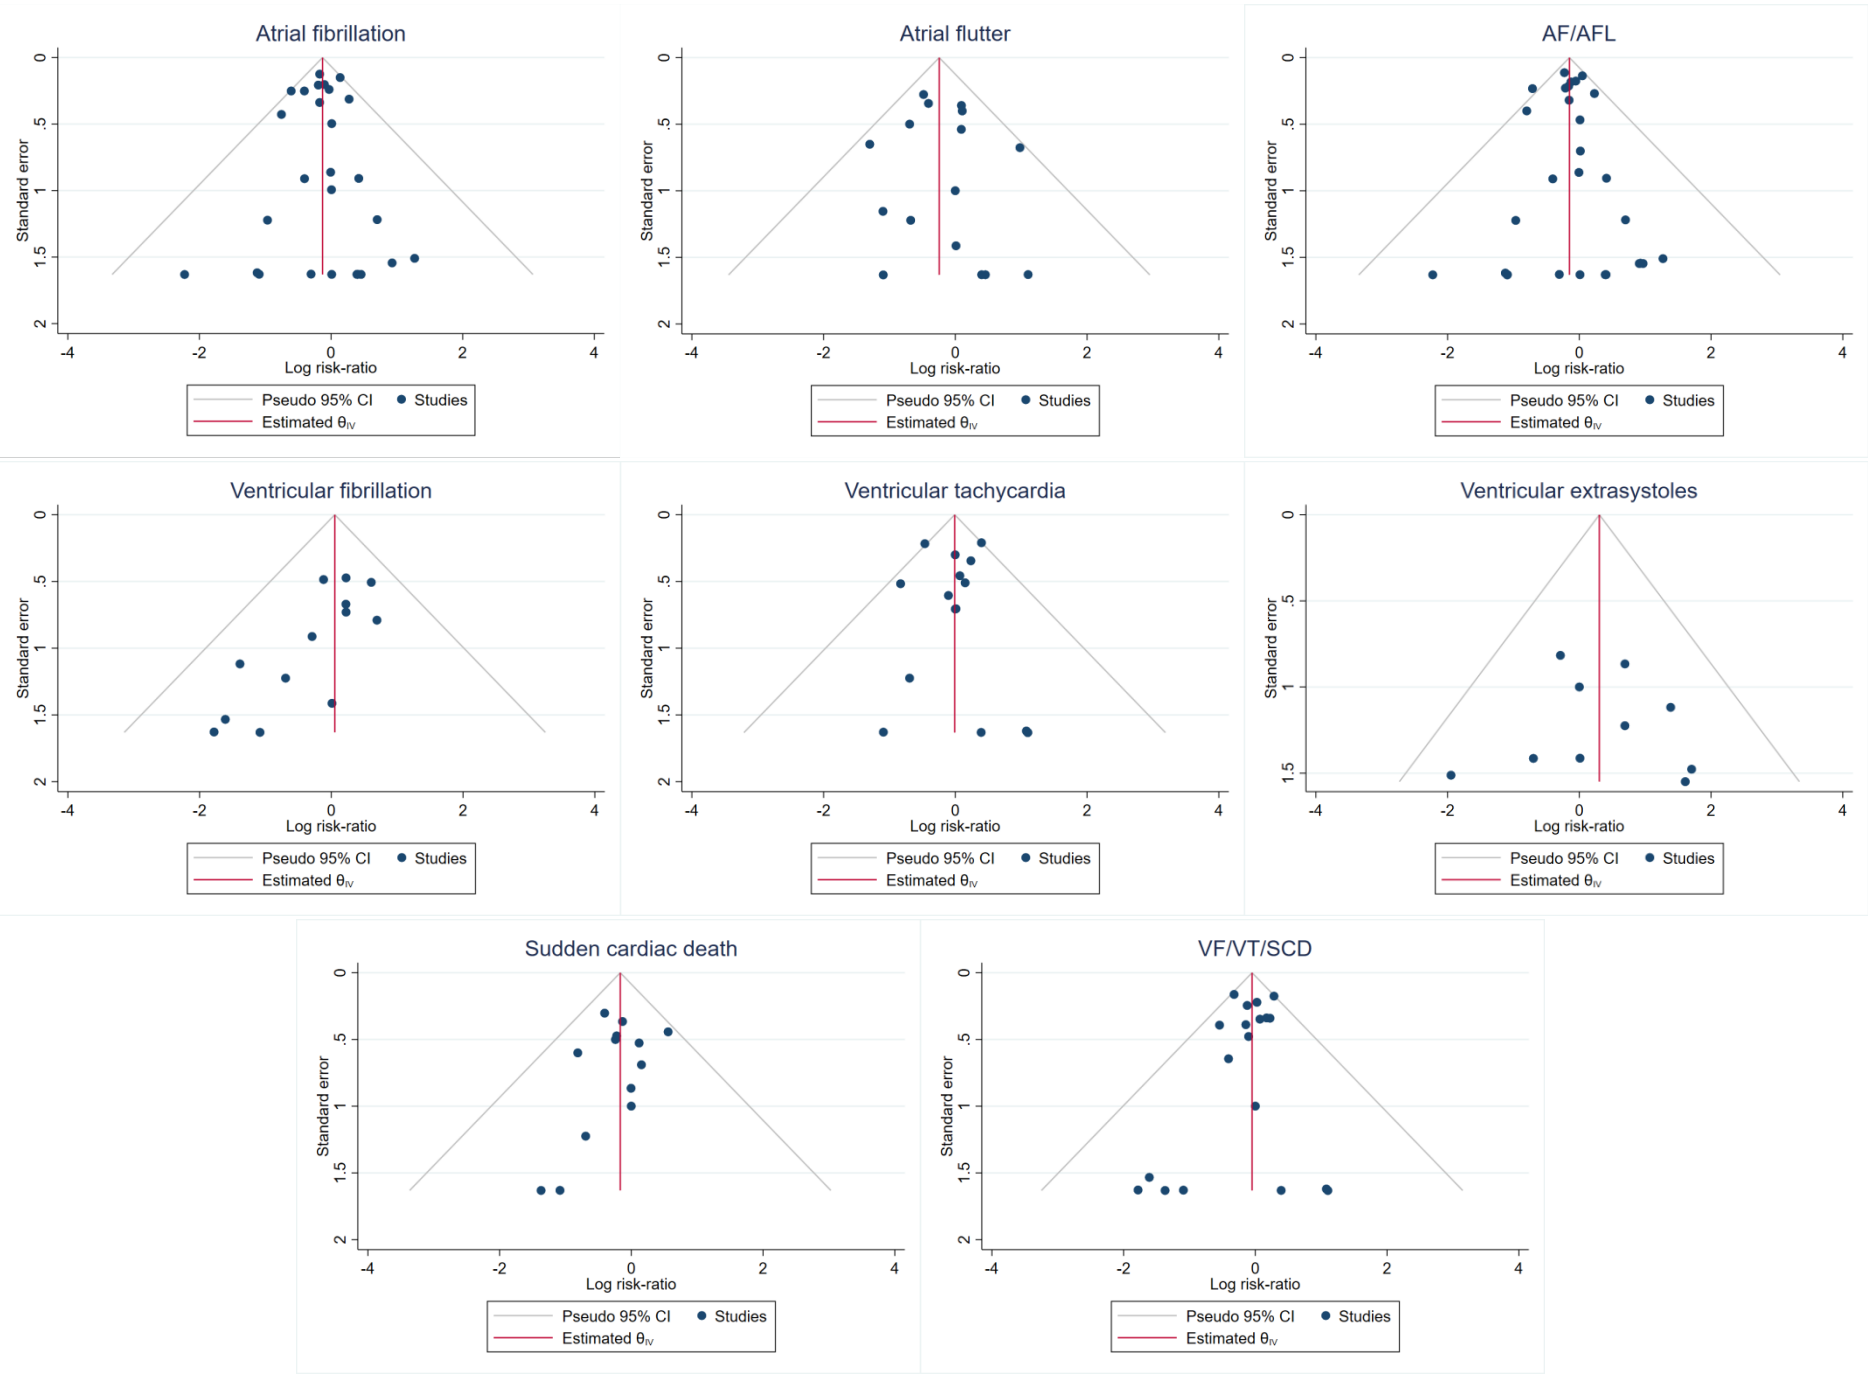



Supplement 12. Estimation of sample size and statistical power

| Outcomes                  | Event rate in<br>SGLT2i | Event rate in<br>Control | Sample size<br>actually<br>included | α  | 1-β<br>POWER | RRR | Sample size needed | outcome<br>reliable? |
|---------------------------|-------------------------|--------------------------|-------------------------------------|----|--------------|-----|--------------------|----------------------|
| Atrial fibrillation       | 502/47560 1.06%         | 491/38705 1.27%          | 86265                               | 5% | 80%          | 0.3 | 23228              | YES                  |
|                           |                         |                          |                                     |    | 95%          | 0.2 | 94135              | YES                  |
| Atrial flutter            | 110/43550 0.25%         | 117/36673 0.32%          | 80223                               | 5% | 80%          | 0.3 | 84540              | NO                   |
| AF/AFL                    | 612/48020 1.27%         | 608/39167 1.55%          | 87187                               | 5% | 80%          | 0.3 | 18444              | YES                  |
|                           |                         |                          |                                     |    | 95%          | 0.2 | 74401              | YES                  |
| Ventricular fibrillation  | 53/40346 0.13%          | 45/33699 0.13%           | 74045                               | 5% | 80%          | 0.3 | 215607             | NO                   |
| Ventricular tachycardia   | 179/43415 0.41%         | 166/36628 0.45%          | 80043                               | 5% | 80%          | 0.3 | 71247              | YES                  |
|                           |                         |                          |                                     |    | 95%          | 0.2 | 258842             | NO                   |
| Ventricular extrasystoles | 24/39867 0.06%          | 14/33305 0.04%           | 73172                               | 5% | 80%          | 0.3 | 392248             | NO                   |
| Sudden cardiac death      | 88/42695 0.21%          | 96/36037 0.27%           | 78732                               | 5% | 80%          | 0.3 | 112569             | NO                   |
| VF/VT/SCD                 | 320/44053 0.73%         | 307/37077 0.83%          | 81130                               | 5% | 80%          | 0.3 | 35165              | YES                  |
|                           |                         |                          |                                     |    | 95%          | 0.2 | 132996             | NO                   |

Supplement 13. Trial sequence analysis of adequate statistical powered outcomes

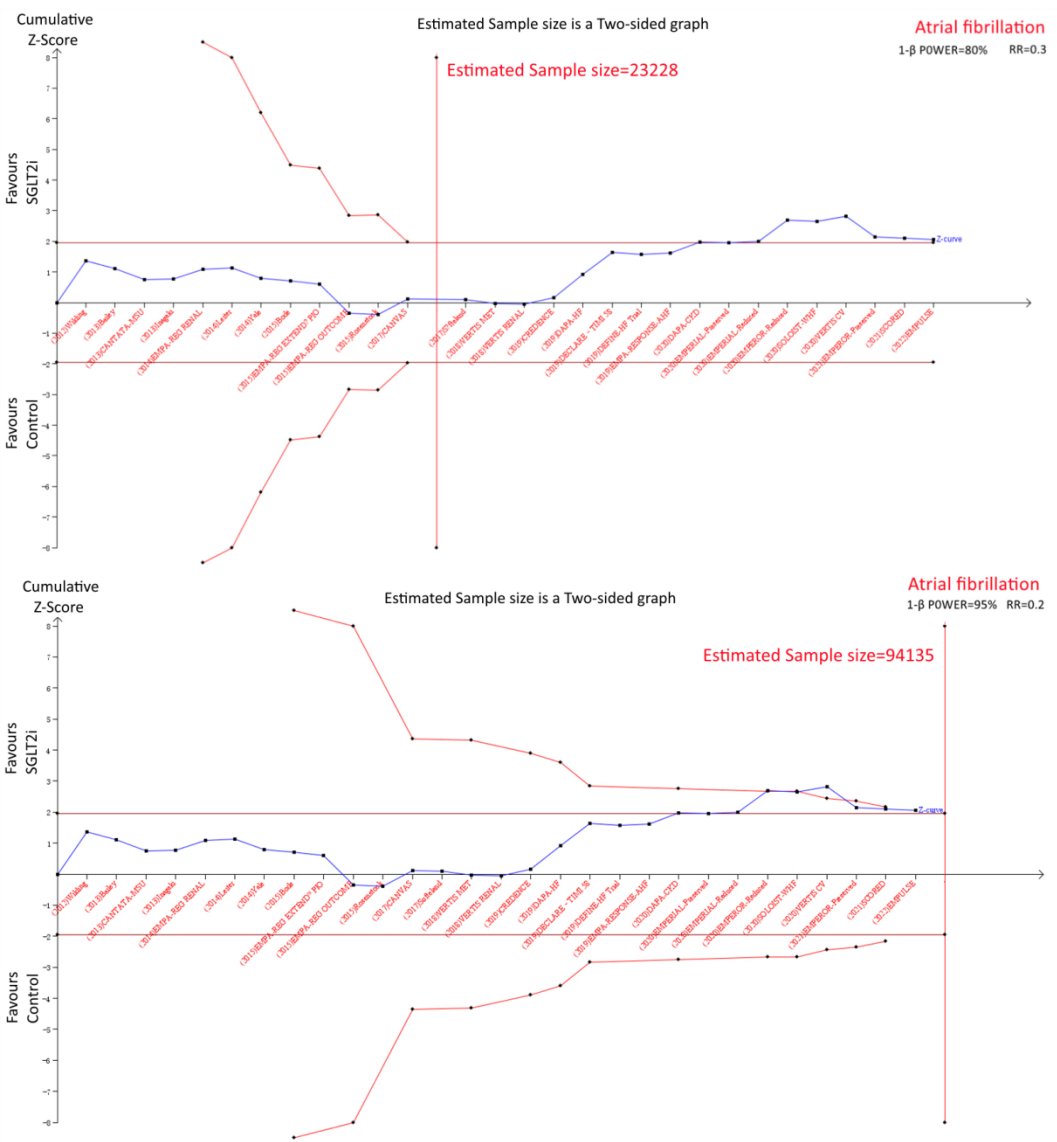

Figure (a). Trial sequence analysis for Atrial fibrillation

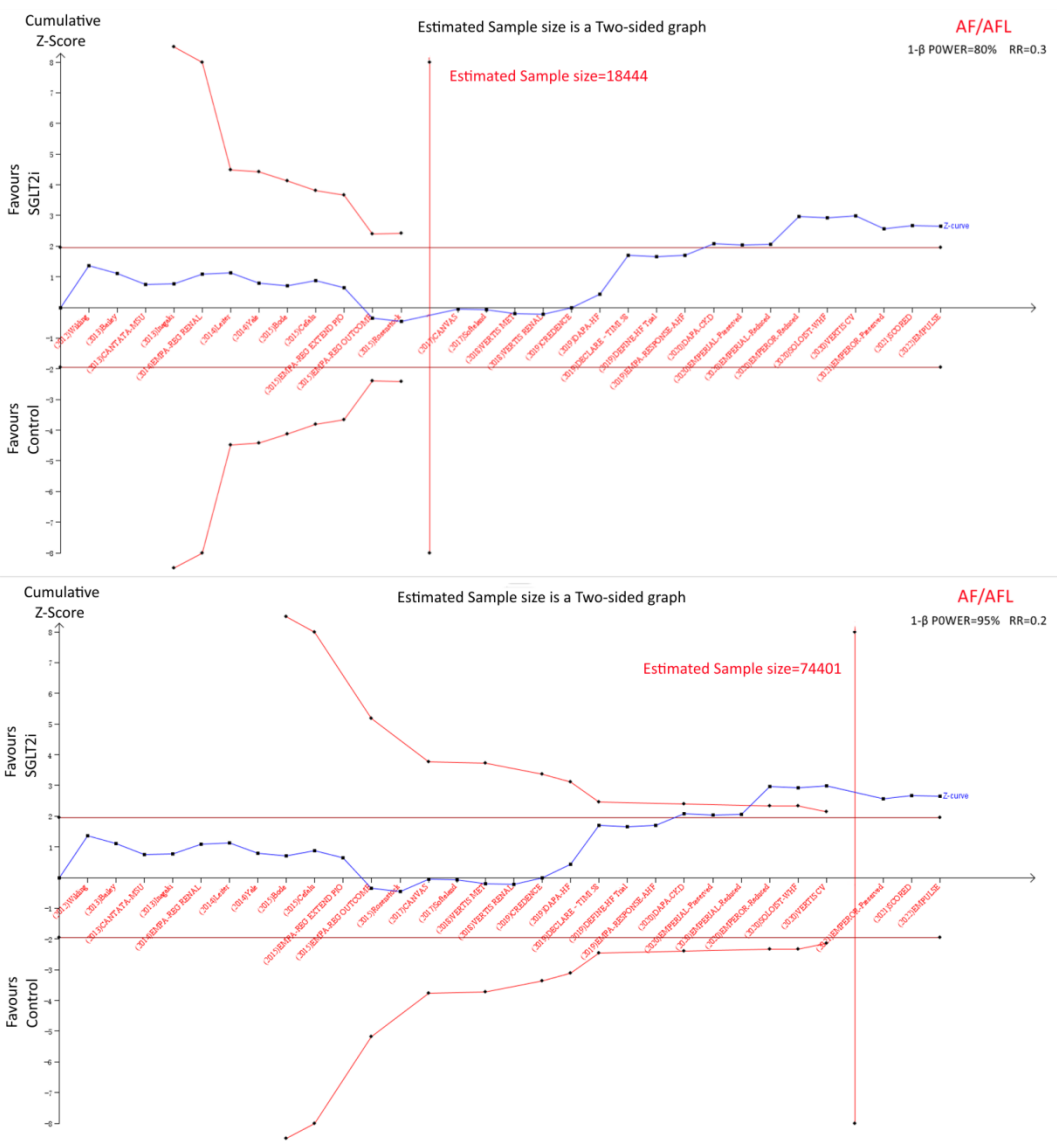

Figure (b). Trial sequence analysis for the composite AF/AFL



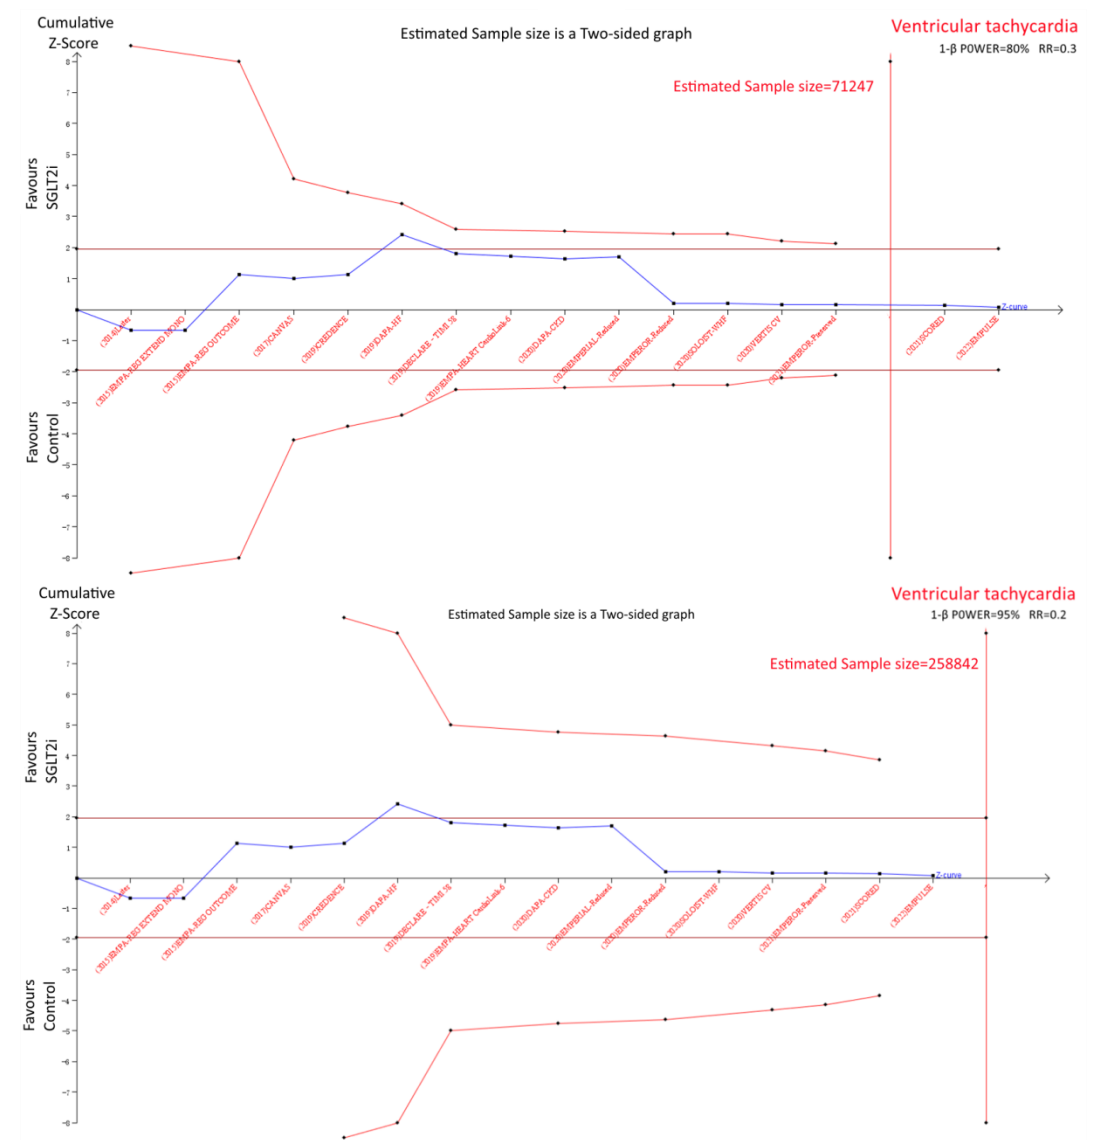

Figure (c). Trial sequence analysis for Ventricular tachycardia

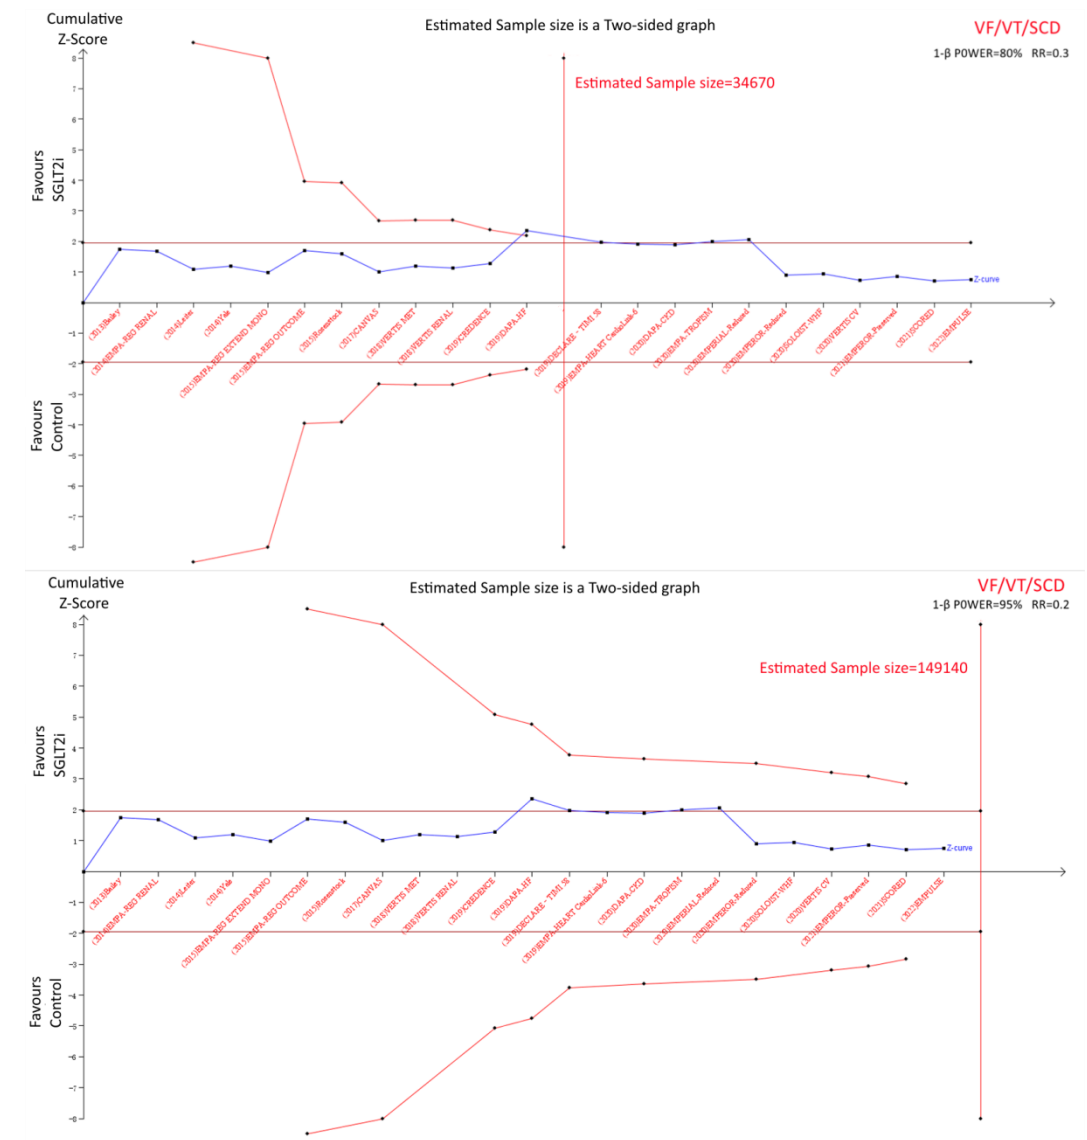

Figure (d). Trial sequence analysis for the composite VF/VT/SCD

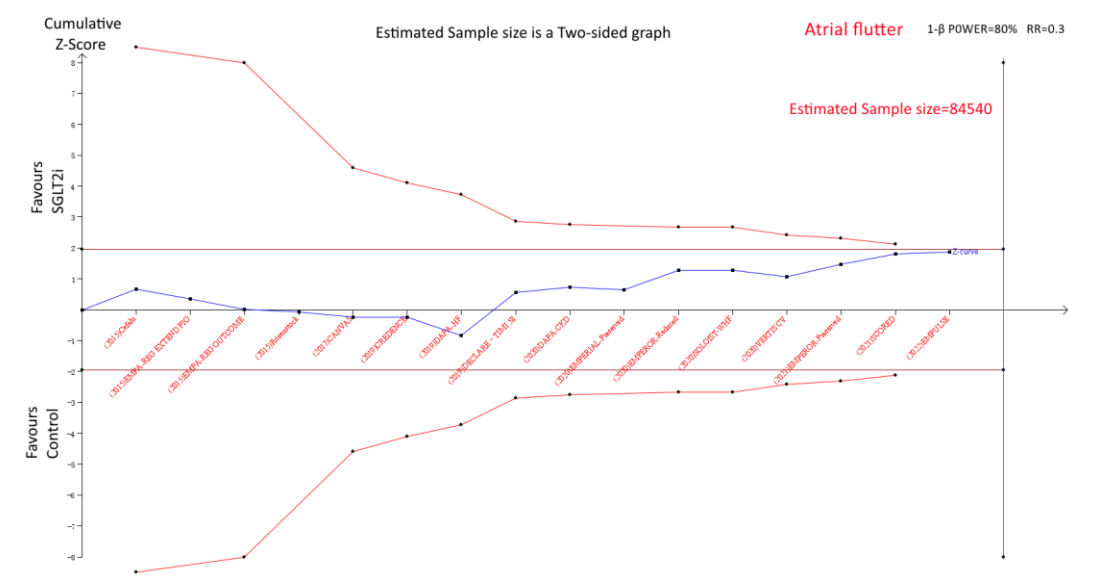

Figure (e). Trial sequence analysis for Atrial flutter

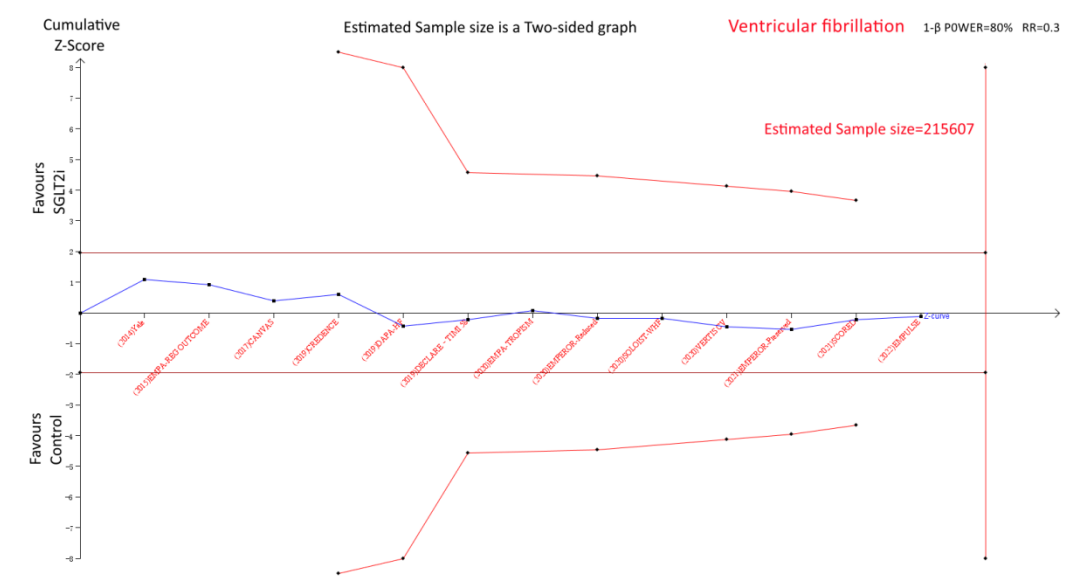

Figure (f). Trial sequence analysis for Ventricular fibrillation

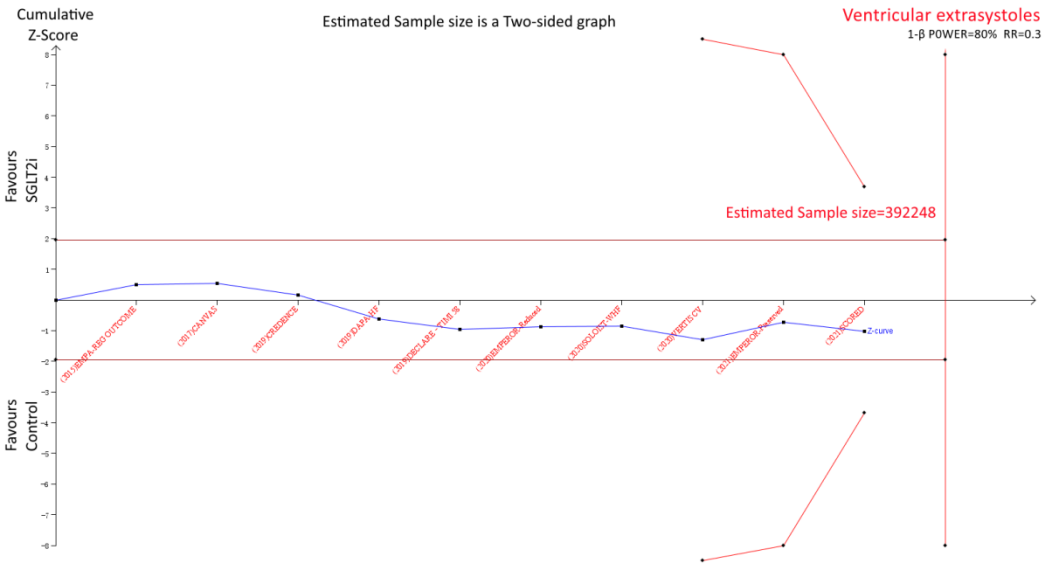

Figure (g). Trial sequence analysis for Ventricular extrasystoles

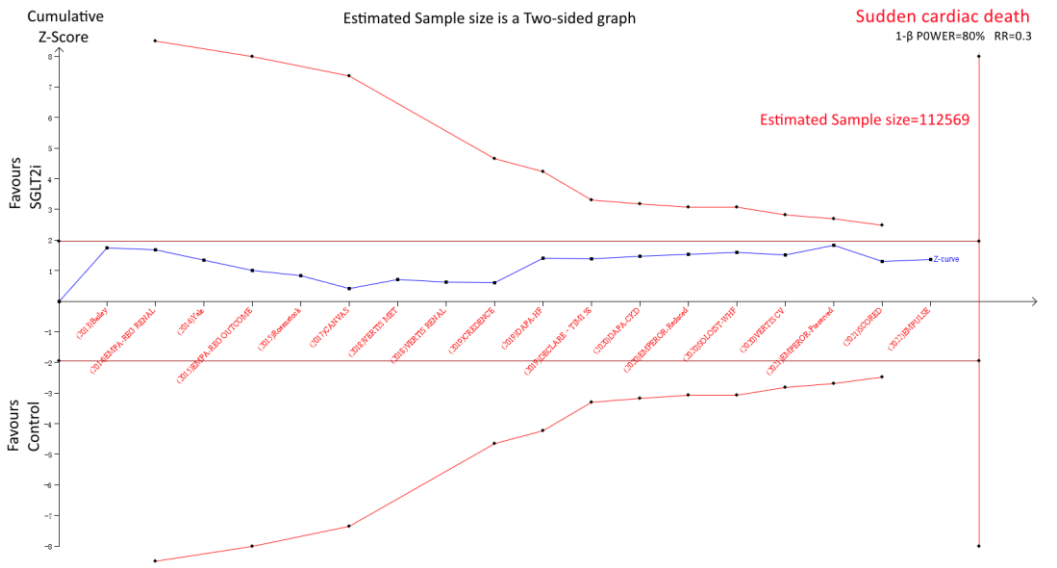

Figure (h). Trial sequence analysis for Sudden cardiac death

Supplement 14. GRADE assessment

| Quality assessment        |                   |                         |                          |                         |                        |                      | No of patients       |                      | Effect                 |                                           | Quality          | Importance |
|---------------------------|-------------------|-------------------------|--------------------------|-------------------------|------------------------|----------------------|----------------------|----------------------|------------------------|-------------------------------------------|------------------|------------|
| No of studies             | Design            | Risk of bias            | Inconsistency            | Indirectness            | Imprecision            | Other considerations | SGLT2i               | Control              | Relative<br>(95% CI)   | Absolute                                  |                  |            |
| Atrial fibrillation       |                   |                         |                          |                         |                        |                      |                      |                      |                        |                                           |                  |            |
| 29                        | randomised trials | no serious risk of bias | no serious inconsistency | no serious indirectness | no serious imprecision | none                 | 502/47560<br>(1.1%)  | 491/38705<br>(1.3%)  | RR 0.88 (0.78 to 1.00) | 2 fewer per 1000 (from 3 more to 0 more)  | ⊕⊕⊕⊕<br>HIGH     | CRITICAL   |
| Atrial flutter            |                   |                         |                          |                         |                        |                      |                      |                      |                        |                                           |                  |            |
| 16                        | randomised trials | no serious risk of bias | no serious inconsistency | no serious indirectness | serious <sup>1</sup>   | none                 | 110/43550<br>(0.25%) | 117/36673<br>(0.32%) | RR 0.78 (0.60 to 1.03) | 1 fewer per 1000 (from 1 more to 0 more)  | ⊕⊕⊕○<br>MODERATE | IMPORTANT  |
| AF/AFL                    |                   |                         |                          |                         |                        |                      |                      |                      |                        |                                           |                  |            |
| 30                        | randomised trials | no serious risk of bias | no serious inconsistency | no serious indirectness | no serious imprecision | none                 | 612/48020<br>(1.3%)  | 608/39167<br>(1.6%)  | RR 0.86 (0.77 to 0.96) | 2 fewer per 1000 (from 1 more to 4 more)  | ⊕⊕⊕⊕<br>HIGH     | CRITICAL   |
| Ventricular fibrillation  |                   |                         |                          |                         |                        |                      |                      |                      |                        |                                           |                  |            |
| 13                        | randomised trials | no serious risk of bias | no serious inconsistency | no serious indirectness | serious <sup>1</sup>   | none                 | 53/40346<br>(0.13%)  | 45/33600<br>(0.13%)  | RR 1.05 (0.70 to 1.59) | 0 more per 1000 (from 0 more to 1 more)   | ⊕⊕⊕○<br>MODERATE | CRITICAL   |
| Ventricular tachycardia   |                   |                         |                          |                         |                        |                      |                      |                      |                        |                                           |                  |            |
| 16                        | randomised trials | no serious risk of bias | no serious inconsistency | no serious indirectness | no serious imprecision | none                 | 179/43415<br>(0.41%) | 166/36628<br>(0.45%) | RR 0.99 (0.80 to 1.22) | 0 fewer per 1000 (from 1 more to 1 more)  | ⊕⊕⊕⊕<br>HIGH     | CRITICAL   |
| Ventricular extrasystoles |                   |                         |                          |                         |                        |                      |                      |                      |                        |                                           |                  |            |
| 10                        | randomised trials | no serious risk of bias | no serious inconsistency | no serious indirectness | serious <sup>1</sup>   | none                 | 24/39867<br>(0.06%)  | 14/33305<br>(0.04%)  | RR 1.36 (0.67 to 2.76) | 0 more per 1000 (from 0 fewer to 1 more)  | ⊕⊕⊕○<br>MODERATE | IMPORTANT  |
| Sudden cardiac death      |                   |                         |                          |                         |                        |                      |                      |                      |                        |                                           |                  |            |
| 13                        | randomised trials | no serious risk of bias | no serious inconsistency | no serious indirectness | serious <sup>1</sup>   | none                 | 88/42695<br>(0.21%)  | 96/36037<br>(0.27%)  | RR 0.85 (0.63 to 1.14) | 0 fewer per 1000 (from 1 fewer to 0 more) | ⊕⊕⊕○<br>MODERATE | CRITICAL   |
| VF/VT/SCD                 |                   |                         |                          |                         |                        |                      |                      |                      |                        |                                           |                  |            |
| 19                        | randomised trials | no serious risk of bias | no serious inconsistency | no serious indirectness | no serious imprecision | none                 | 320/44053<br>(0.73%) | 307/37077<br>(0.83%) | RR 0.95 (0.81 to 1.11) | 0 fewer per 1000 (from 2 fewer to 1 more) | ⊕⊕⊕⊕<br>HIGH     | CRITICAL   |

<sup>1</sup> Imprecision was downgraded because the 95% of the relative risk was sufficiently wide that the estimate could include appreciable harm or benefit of the intervention (thresholds: 0.75 and 1.25).
